# Supplementary material for: Impact of Venetoclax Trough Levels on Safety and Efficacy in the Treatment of Acute Myeloid Leukemia
Source: Research Square preprint supplement (doi:10.21203/rs.3.rs-6994976/v1), 2025-08-04
Supplement: Supplementary file 1 [file b18635406ffc6fdb27c3e31d.docx]

**Supplemental Table 1. Toxicity of venetoclax and azacitidine treatment**

| **Hematologic toxicity** | | |  |
| --- | --- | --- | --- |
|  | **Cycle 1*** | **Cycle 2** | **Cycle 3** |
| Any hematological toxicity | 131 (91.1%) | 70 (80.5%) | 28 (60.9%) |
| Neutropenia | 125 (89.3%) | 64 (73.6%) | 23 (80.0%) |
| Anemia | 103 (73.6%) | 42 (48.3%) | 15 (32.6%) |
| Thrombocytopenia | 110 (78.6%) | 48 (55.2%) | 20 (43.5%) |
| **Febrile neutropenia** | 68 (48.6%) | 25 (28.7%) | 3 (6.5%) |
| **Infection other than FN** | 28 (20.0％) | 10 (11.5%) | 1 (2.2%) |
| **Other adverse events of grade 3 or more** | |  |  |
| Appetite loss | 3 | 0 | 1 |
| Hemorrhage | 1 | 1 | 0 |
| Hepatic dysfunction | 3 | 0 | 0 |
| Heart failure | 3 | 0 | 0 |
| TLS | 1 | 0 | 0 |
| Others | 8 | 3 | 1 |

FN: febrile neutropenia, TLS: tumor lysis syndrome.
